# Supplementary material
Source: Research Square preprint supplement (doi:10.21203/rs.3.rs-8691105/v1)
Supplement: Supplementary file 2 [file 538087640fabf08aac806e8a.docx]

**Table 1** Basic characteristics of the included studies

| **First Author** | **Year** | **Study Type** | **Study Object** | **Sample Size** | | **Outcome Measures** |
| --- | --- | --- | --- | --- | --- | --- |
| **E** | **C** |
| Chen Y [10] | 2022 | RCT | Dental Crown | 12 | 12 | Occlusal Surface Contour, Cusp Angle |
| Kollmuss M [11] | 2013 | RCT | Dental Crown | 39 | 39 | Occlusal Surface Contour |
| Kollmuss M [12] | 2016 | RCT | Dental Crown | 22 | 22 | Occlusal Surface Contour |
| Litzenburger AP [13] | 2013 | RCT | Dental Crown | 5 | 25 | Occlusal Surface Contour |
| Chao JH [14] | 2024 | RCT | Dental Crown | 30 | 30 | Cusp Angle |
| Ding H [15] | 2023 | RCT | Dental Crown | 12 | 12 | Cusp Angle |
| Liu CM [16] | 2024 | RCT | Dental Crown | 12 | 12 | Design Time |
| Lei L [17] | 2024 | RCT | Dental Crown | 58 | 58 | Design Time |
| Ender A [18] | 2011 | RCT | Dental Crown | 12 | 12 | Design Time |
| Koudai Nagata [19] | 2025 | RCT | Dental Crown | 10 | 10 | Design Time, the Accuracy of Occlusal Surface |
| Liu CM [20] | 2025 | RCT | Dental Crown | 10 | 10 | the Accuracy of Occlusal Surface |
| Wu ZQ [21] | 2025 | RCT | Dental Crown | 33 | 33 | Design Time, the Accuracy of Occlusal Surface |
